# Supplementary material
Source: publisher figshare collection journal article supplement (https://gsapubs.figshare.com/ndownloader/files/38278164)
Supplement: Supplementary file 1 [file 38278164]

## Sheet: Sheet1
Major and trace element compositions for early Paleozoic intrusive rocks in the Ganqimaodu area
Sample	20ZH01-2	20ZH01-3	20ZH14-2	20ZH14-3	20ZH18-2	20ZH18-3	20ZH30-2	20ZH30-3
Lithology	Two-mica granite		Diorite porphyrite		Quartz diorite		Quartz diorite
SiO2	69.1281	68.6069	49.4955	49.6692	55.9749	55.3106	60.3491	60.2265
TiO2	0.3029	0.3174	1.0749	1.0855	0.5314	0.5391	0.4754	0.5368
Al2O3	16.2763	16.256	19.3548	19.4361	20.2997	20.5029	18.2169	17.8105
TFe2O3	2.24	2.35	9.8	9.63	5.3	5.54	4.52	4.78
MnO	0.0317	0.0372	0.1627	0.158	0.1133	0.1184	0.0931	0.0835
MgO	0.92	0.95	5.23	4.99	2.75	2.89	2.62	2.53
CaO	1.94	1.67	2.59	2.91	6.37	6.85	4.9	5.54
Na2O	5.6856	5.9347	5.9667	6.0349	3.2773	3.0908	5.2706	5.1303
K2O	1.2808	1.4227	0.9358	0.9793	2.3362	2.3233	1.5905	1.7359
P2O5	0.1027	0.1061	0.3046	0.2771	0.1536	0.143	0.124	0.1544
LOI	1.83	2.16	5.04	5.07	2.49	2.48	1.64	1.33
TOTAL	99.7381	99.811	99.955	100.24	99.5964	99.7881	99.7996	99.8578
A/CNK	1.14112	1.13394	1.24597	1.19424	1.04115	1.02263	0.944045	0.873637
Mg＃	44.8621	44.4704	51.3907	50.6542	50.6877	50.8219	53.4514	51.1846
Na2O/K2O	4.4391	4.17143	6.37604	6.16246	1.40283	1.33035	3.3138	2.95541
Ba	557	534	267	340	832	816	356	339
Ce	28.1	35.6	34.3	30.5	24.3	20.9	20.3	31.4
Dy	0.94	1.05	3.93	4.18	2.24	2.26	2	2.46
Er	0.51	0.5	2.41	2.5	1.4	1.45	1.29	1.46
Eu	0.57	0.59	1.36	1.3	0.91	0.92	0.7	1
Gd	1.24	1.36	4.42	4.39	2.55	2.56	2.19	2.82
Hf	2.6	2.8	3.2	3.2	2.2	2.1	2.6	2.5
Ho	0.18	0.19	0.82	0.89	0.48	0.5	0.43	0.52
La	16.9	18.1	15	13.4	12.7	11.3	10.5	17.8
Lu	0.08	0.08	0.35	0.38	0.26	0.26	0.22	0.25
Nb	7.7	7.9	6.1	6.7	10	9.6	4.9	5.8
Nd	11.1	12.1	19.3	17.3	12.3	11.3	9.5	14.8
P	440	450	1330	1270	630	600	540	680
Pb	7.7	7.5	6	6.7	6.3	6.1	10	9.3
Pr	3.41	3.71	4.52	4.07	3.11	2.74	2.38	3.81
Rb	31.8	35.4	33.2	30.6	80.5	75.2	40	43
Sm	1.82	2.03	4.62	4.38	2.84	2.75	2.16	3.14
Sr	554	438	542	491	914	927	803	780
Ta	0.47	0.53	0.22	0.24	0.39	0.39	0.3	0.31
Tb	0.17	0.2	0.67	0.72	0.39	0.4	0.35	0.43
Th	3.62	3.54	0.28	0.19	2.42	1.89	3.83	4.3
Ti	0.151	0.163	0.583	0.58	0.273	0.282	0.276	0.306
Tm	0.07	0.08	0.36	0.36	0.22	0.22	0.21	0.21
U	0.46	0.48	0.26	0.33	0.51	0.46	0.91	1.31
Y	5.1	5.6	21.5	22.3	13.4	13.4	12.1	14
Yb	0.46	0.53	2.15	2.26	1.5	1.58	1.28	1.45
Zr	96	104	128	129	89	82	108	103

## Sheet: Sheet2
Table S1. Major and trace element compositions for blocks from the ophiolitic mélanges in the western Ganqimaodu area
Sample	20ZH03-2	20ZH04-2	20ZH04-3	21ZH08-2	21ZH08-3	21ZH09-2	21ZH09-3	21ZH10-2	21ZH10-3
Lithology	Metavolcanic rock	Metavolcanic rock		Metavolcanic rock		Metavolcanic rock		Plagiogranite
SiO2	49.3626	55.4946	50.6561	50.5	49.37	48.49	48.62	71.89	69.84
TiO2	3.0023	1.3686	1.333	1.56	1.49	2.95	3.2	0.13	0.14
Al2O3	12.8524	13.015	14.3053	14.32	13.95	12.68	12.66	15.08	16.06
TFe2O3	17.59	9.79	10.31	11.92	10.94	17.1	17.86	1.06	1.16
MnO	0.3034	0.1237	0.1595	0.16	0.14	0.26	0.27	0.01	0.01
MgO	5.44	5.7	7.56	7.35	7.02	5.43	5.35	2.12	2.34
CaO	8.42	7.42	10.6	9.65	10.9	8.3	8.11	0.43	0.42
Na2O	0.805	3.5223	2.8882	3.14	2.89	1.36	1.2	6.97	7.03
K2O	0.2306	0.1212	0.1954	0.18	0.13	0.2	0.16	0.64	0.96
P2O5	0.2841	0.1421	0.1411	0.16	0.17	0.28	0.32	0.07	0.07
LOI	1.54	3.23	1.22	1.59	3.1	2.62	2.77	1.71	1.81
TOTAL	99.8304	99.9275	99.3686	100.53	100.1	99.67	100.52	100.11	99.84
Na2O/K2O	3.49089	29.0619	14.781	17.4444	22.2308	6.8	7.5	10.8906	7.32292
CaO/MgO	1.54779	1.30175	1.40212	1.31293	1.55271	1.52855	1.51589	0.20283	0.179487
Ba	105.5	71.7	46.5	77	55.3	48.2	46.3	193	257
Ce	43.5	16.7	16.2	19.7	24.6	39.5	43.8	11.9	12.5
Dy	10.45	5.38	5.26	5.44	6.18	8.7	9.89	0.54	0.55
Er	6.07	3.19	3.1	3.33	3.76	5.27	5.89	0.29	0.29
Eu	2.67	1.45	1.31	1.43	1.57	2.37	2.67	0.3	0.28
Gd	9.38	4.74	4.69	5.02	5.72	8.22	9.37	0.75	0.76
Hf	5.9	2.5	2.4	2.8	3	5.3	5.9	2.2	2.2
Ho	2.16	1.1	1.1	1.14	1.3	1.78	2.04	0.1	0.1
La	17.8	7.2	6.5	8.6	10.5	17.2	19.3	6.1	6.1
Lu	0.83	0.42	0.41	0.45	0.51	0.73	0.82	0.05	0.05
Nb	16	7.3	6.7	8.5	8.8	15.3	16.5	1.7	1.7
Nd	26	12.5	12	13.3	16.3	25.6	28.5	5.2	5.7
P	1260	620	640	690	770	1240	1390	360	360
Pb	7	1.9	1.8	0.7	1.1	8.8	9.9	1.3	1.1
Pr	6.13	2.53	2.42	2.7	3.36	5.42	6.02	1.37	1.47
Rb	2.5	3.1	4.5	3.9	3.3	5.7	3.7	13.2	20.1
Sm	7.69	3.75	3.67	3.8	4.64	6.78	7.71	0.94	1
Sr	108	135	176.5	173	230	255	279	384	419
Ta	0.93	0.4	0.36	0.51	0.49	0.92	0.97	0.12	0.12
Tb	1.59	0.79	0.8	0.82	0.93	1.32	1.5	0.1	0.1
Th	1.85	0.61	0.59	0.58	0.65	1.48	1.67	0.8	0.77
Ti	16750	7800	7800	9370	8760	16950	17900	800	760
Tm	0.88	0.45	0.44	0.5	0.56	0.77	0.88	0.05	0.04
U	0.83	0.34	0.28	0.31	0.42	0.55	0.65	0.38	0.42
Y	55.3	28.5	27.3	32	37	51.1	57.4	3.4	3.5
Yb	5.39	2.72	2.71	2.97	3.38	4.72	5.31	0.26	0.26
Zr	209	91	88	103	114	199	220	71	70
Ni	37.3	38.6	54.6	61.9	54.7	45.3	42.8	69.7	73.4

## Sheet: Sheet3
Major and trace element compositions for (meta-)basalts in the eastern Ganqimaodu area
Sample	20ZH20-2	20ZH20-3	20ZH21-2	20ZH21-3	20ZH28-2	20ZH28-3	21ZH26-2	21ZH26-3	21ZH28-2	21ZH28-3	21ZH30-2	21ZH30-3
Lithology	Meta-basalt		Meta-basalt		Pillow basalt		Pillow basalt		Pillow basalt		Pillow basalt
SiO2	48.034	47.304	47.3186	47.2164	42.4641	45.0089	44.72	45.46	47.42	44.86	42.55	45.32
TiO2	3.274	3.4931	3.2743	3.1833	1.9861	2.1175	1.34	1.52	1.61	1.46	1.52	1.57
Al2O3	13.7973	13.7262	13.4518	13.462	16.317	16.7742	13.54	13.44	13.78	12.44	14.04	14.95
TFe2O3	14.35	15.08	15.54	15.09	6.7	5.76	9.41	11.34	11.5	12.14	12.28	13.2
MnO	0.2145	0.2341	0.2608	0.2431	0.1541	0.1178	0.13	0.15	0.15	0.14	0.18	0.18
MgO	5.73	5.62	5.77	5.54	3.72	2.32	5.31	6.48	4.31	3.45	6.81	7.03
CaO	9.91	10.01	10.7	11.32	11.43	11.19	17.5	10.85	13.05	15.1	13.05	9.36
Na2O	1.8083	1.6452	0.8274	0.6464	4.7319	4.6321	0.14	3.12	3.1	2.87	2.81	3.44
K2O	0.5658	0.573	0.3647	0.3057	1.6575	2.595	0.04	0.16	0.04	0.05	0.05	0.07
P2O5	0.4785	0.4944	0.4428	0.4344	0.1956	0.2196	0.13	0.14	0.16	0.15	0.15	0.15
LOI	1.23	1.22	1.51	2.09	10.77	9.16	7.62	7.57	5.27	7.02	7.02	4.95
TOTAL	99.3924	99.3999	99.4604	99.5313	100.126	99.895	99.88	100.23	100.39	99.68	100.46	100.22
Na2O/K2O	3.19601	2.8712	2.26871	2.11449	2.85484	1.78501	3.5	19.5	77.5	57.4	56.2	49.1429
CaO/MgO	1.72949	1.78114	1.85442	2.04332	3.07258	4.82328	3.29567	1.67438	3.02784	4.37681	1.9163	1.33144
Ba	107.5	76.2	44	53.3	93.4	137	88.1	35.8	58.1	54.2	28.8	38.9
Ce	62.4	63	51.6	49.5	21.8	26.6	16.9	19.3	21.3	18.6	19	19.4
Dy	6.61	7.12	8	7.73	5.29	6.45	3.56	4.6	4.55	4.15	4.55	4.58
Er	3.38	3.58	4.22	4	3.14	3.88	2.08	2.76	2.66	2.4	2.68	2.63
Eu	2.62	2.61	2.93	2.74	1.27	1.73	1.11	1.32	1.38	1.19	1.41	1.34
Gd	8.12	8.46	8.95	8.3	4.78	6.44	3.47	4.48	4.5	4.03	4.29	4.3
Hf	5.9	6.3	4.9	4.6	3.2	3.5	2.3	2.7	2.8	2.5	2.7	2.7
Ho	1.3	1.35	1.57	1.51	1.08	1.36	0.72	0.96	0.93	0.85	0.94	0.92
La	27.2	27.8	22.9	22.6	8	9.9	7.5	8.3	9.6	8.2	8.4	8.8
Lu	0.43	0.46	0.54	0.45	0.43	0.56	0.26	0.38	0.35	0.33	0.35	0.36
Nb	35.8	37.3	30.2	28.8	11.6	12.3	7.5	8.1	8.9	8.1	7.9	8.4
Nd	35.2	36.1	33.4	32.5	15.7	18.3	11.2	12.7	13.9	12.1	12.6	12.8
P	2090	2190	1950	1910	850	950	630	640	740	720	680	670
Pb	7.7	6.8	5.6	5.5	1.2	0.7	0.5	0.6	0.5	0.5	<0.5	<0.5
Pr	8.13	8.46	7.42	7.21	3.26	3.78	2.35	2.68	2.9	2.53	2.63	2.62
Rb	19.1	19.5	12.3	12.9	25.8	48.3	1.1	3.9	0.7	0.8	0.7	1
Sm	8.1	8.43	8.43	8	4.64	5.37	2.96	3.53	3.58	3.16	3.43	3.42
Sr	334	278	133	217	97.9	110.5	73.9	152	181	132	201	167.5
Ta	2	2.2	1.8	1.7	0.66	0.7	0.5	0.5	0.53	0.5	0.52	0.52
Tb	1.24	1.25	1.38	1.28	0.78	1.07	0.55	0.71	0.71	0.63	0.72	0.69
Th	2.48	2.61	2.07	2.02	0.99	0.99	0.45	0.49	0.71	0.5	0.52	0.52
Ti	18550	20000	18800	17950	11350	11850	8030	8860	9480	8800	8940	9030
Tm	0.45	0.5	0.6	0.54	0.45	0.57	0.29	0.41	0.39	0.36	0.4	0.39
U	0.75	0.74	0.97	0.9	3	2.59	0.22	0.28	1.02	0.66	0.35	0.25
Y	34.9	35.2	40.7	39.3	29.3	34.2	20.5	27.4	26.7	24.5	26.7	25.4
Yb	2.8	2.93	3.39	3.14	2.79	3.4	1.76	2.45	2.27	2.16	2.34	2.36
Zr	249	261	186	179	127	137	87	101	109	96	96	100
Ni	41.8	41.8	37.5	33.8	182	105	67.3	52.4	50.6	42.7	51.8	52.8
